# Supplementary material for: Barriers and Facilitators to Implementing Sustainable School Meals in Swedish High School — A Qualitative Study with Students and Meal Staff
Source: Research Square preprint supplement (doi:10.21203/rs.3.rs-1359061/v1), 2022-02-17
Supplement: Supplementary file 1 [file 1e5a434b28c970e3640faefa.docx]

**Supplementary Table 2.** Interview guides in English**.**

**For Kitchen Staff**

*Introductory Questions*

Contemporary diets, which are high in animal products and low in fruit and vegetables, are a leading contributor to greenhouse gas emissions and chronic illness. Therefore, I would like to ask you little bit about your views on the role food plays on climate and health and to see what your thoughts are in relation to the school meals at your school and their climate impact. Is that ok?

1. What is your role at this school?
2. How long have you worked here?
3. Can you tell me about the school meals here?

***Characteristics of individuals***

*Knowledge or beliefs about nutritious and sustainable food*

1. What does being healthy mean to you? Could you please give an example of a way to eat that is healthy? What do you think about this way of eating?
2. How do you think food relates to the climate? What does sustainable mean to you? Could you please give an example of a way of eating that is sustainable? What do you think about this?
3. How would you describe the school meals now in relation to what you just described as healthy and sustainable?

***Intervention Characteristics***

*Intervention Source*

*Influences and Adaptability*

*Complexity*

***Outer Setting Drivers of Change***

*Needs and resources*

1. What factors influence the meals that you provide in your school? What do you think influences the students’ choices when eating in school?
2. What do you like about the school meals that your school provides? What would you like to change? What should not change?

10. What would you need to think about if you were to implement sustainable school lunches in your school? How complicated would it be for you and your colleagues to do those things?

1. To what extent is the school staff aware of the needs and preferences of the students when it comes to food? Do you think adjusting school meals to be more climate- friendly will meet the needs and preferences of the students?
2. How do you think the students would respond to a change in school meals to be more climate-friendly? What barriers might the students face to participating in a change of school meals to be more climate-friendly?

***Inner Setting****Networks and Communication*

*Culture*

1. What do you think are the drivers of change in general in your school? What or who might be a driver of change for your school meals?
2. Would your school be a good setting to change eating habits to be more climate- friendly? Why or why not is your school a good place for this kind of implementation?
3. Do you foresee any potential roadblocks if your school were to change the menu plans? If so, what might those be?

***Characteristics of individuals***

*Self-efficacy*

16. Can you describe your working relationships with your colleagues and leaders? How do you typically find out about new information, such as new initiatives, accomplishments, issues, new staff, staff departures?

17. How would you describe the culture of your school? Of your own setting or unit? To what extent are new ideas embraced and used to make improvements in your school?

18. How confident are you that you would be able to successfully adjust the meals at your school to be more climate-friendly? How confident do you think your colleagues feel changing school meals?

***Process****Opinion Leaders*

19. Who are the key influential individuals to get on board with changing school meals at your school? What might those influential individuals say about it?

*Intervention participants*

**For Students**

Contemporary diets, which are high in animal products and low in fruit and vegetables, are a leading contributor to greenhouse gas emissions and chronic illness. Therefore, I would like to ask you little bit about your views on the role food plays on climate and health and to see what your thoughts are in relation to the school meals at your school and their climate impact. Is that ok?

*Introductory Questions*

1. What school year are you in?
2. How old are you?
3. What gender do you identify with? (you do not have to answer this if you do not want

to)

19. How do you and your colleagues communicate to students when it comes to the meal plan and changes in the school meals? What is the communication like between the staff and students at your school?

4. How often do you usually eat in school? Can you tell me a little bit about your school meals?

***Characteristics of individuals***

*Knowledge or beliefs about nutritious and sustainable food*

1. What does being healthy mean to you? Could you please give an example of a way to eat that is healthy? What do you think about this way of eating?
2. How do you think food relates to the climate? What does sustainable mean to you? Could you please give an example of a way of eating that is sustainable? What do you think about this?
3. How would you describe the foods you eat now in relation to what you just described as healthy and sustainable?

*Influences and Adaptability*

*Attitudes*

***Intervention Characteristics***

8. What do you think influences your food choices outside of school? What do you think influences your food choices when eating school meals?

9. What do you like about your school meals? What would you like to change? What should not change?

1. What do you think your role as a student is in transitioning the meals at your school? What is the role of the school?
2. How would you feel about your school meals changing? In what ways should they change? Would that change how inclined you are to eat the school meals? If so, in what ways?

12. Is your school a good place for you to change your eating habits? Why or why not?

***Inner setting***

13. Do you feel influenced by the adults in your school? If so, which roles do they hold? What kind of influence do they have?
