# Supplementary material for: Barriers and Facilitators to Implementing Sustainable School Meals in Swedish High School — A Qualitative Study with Students and Meal Staff
Source: Research Square preprint supplement (doi:10.21203/rs.3.rs-1359061/v1), 2022-02-17
Supplement: Supplementary file 2 [file 487c41e522c0f8fc4e1decb2.docx]

**Supplementary Table 1:** Determinants of implementation from qualitative analysis.

| CFIR domain | Determinants of implementation | Examples from interviews |
| --- | --- | --- |
| Characteristics of individuals  Students and kitchen staff | *Facilitators*   1. Students perceive they have power to influence menu 2. Both students and staff express an interest in change 3. Knowledge and interest to provide more sustainable meals among staff   *Barriers*   1. Students have a low sense of agency over food choice at home and at school 2. Students are skeptical toward less meat 3. Students do not eat food they don’t like or that is unfamiliar 4. Students are not involved in environmental issues related to food 5. Confusion about vegetarian food and plant-based protein among students leads to not wanting plant-based foods 6. Students have preconceived views on school meals 7. Students do not want to eat vegetarian | *“*[*...*] *what we eat also influences what will be served. So then when the food is already made and we choose to eat it, that doesn’t increase the impact and we show that, yeah, this is what we want. So, in that case they, students could choose to eat vegetarian instead, but then there is the risk that that food will run out and then we will need to eat the other food anyway.”* (Male, year 3, 18).  *“Maybe if one switches something out for vegetarian, and then, then one can have, instead of- we can switch out the meat for- what’s it called- plant-based protein”* (Male, year 1, 16).  *“We try to reduce the amount of meat, especially beef, increase turkey and chicken. And, like I said, we have, some weeks we have two vegetarian days”* (Head chef).  *“*[*...*] W*e have the opportunity to take these courses and we are good at that. We have received a diploma for being so good at participating in all of the possible courses and programs and lectures.* [*...*] *We had a lot of vegetarian and a lot, a lot, yeah, inspiration courses for the salad buffe and hot kitchen, cold kitchen. I think that all of the girls have participated in the basecourses.”* (Head chef)  *“One can also believe that as a student maybe one shouldn’t have to go around thinking about that so much. Or maybe they should, but I do not think it is even a student’s first priority to think about.”* (Male, year 2, 17)  *“We are raised with this, with that a meal is not really a meal without some type of meat. It should always be chicken and pasta, spaghetti with meat sauce, meatballs. It should always be something with meat.”* (Male, year 2, 17)  *“I eat what is served. But maybe if at home it’s more that I like the food since I am more used to it than the school food here. So, it is maybe that I- sometimes maybe I eat less because I am not particularly fond of what they are serving.”* (Female, year 3, 19)  *“Oh, I am not so very inserted, but I have heard that meat contributes very much to the climate and emissions and stuff. I don’t know so much more.”* (Female, year 3, 19)  *“My reaction to if they would change would probably not be very big as long as it does not become a really big change and the school makes- yeah, one hundred percent vegetarian. Then it would have been a little, yeah, because I also consider that we need animal products especially for protein”* (Male, year 3, 18).  *“*[*...*] *I think that it’s just about that kids’ perception of school food has always been skewed. It’s gross food in school. That is how people grow up to think. So, I think it’s like, people that don’t like the school food, they will never like the school food. They don’t like the school food at their old school, in their new school. That’s how it is. So, I think that if one also- that people have wanted to make change and they are making changes, people will still find new problems”* (Female, year 2, 17)  *“I would maybe want less vegetarian. It is surely good for the environment, but I don’t think it’s very good.”* (Female, year 1, 16) |
| Inner Setting:  School meal environment Relationships between stakeholders | *Facilitators*   1. Positive and supportive work environment for kitchen staff 2. Students and kitchen staff have strong respect and communication with one another 3. Support for current initiatives to improve sustainabilty of school meals among students and kitchen staff 4. Kitchen staff have knowledge and resources to make adjustments while considering the students’ needs and preferences   *Barriers*   1. Kitchen staff are challenged to get high school students to accept change 2. Stigma among students around vegan and vegetarian food | *“We have a good relationship with each other, we have good collaboration and everything that- if there is anything that one will decide- we think about each other, what they think, or what you think. We ask each other, then we bring it up”* (Kitchen assistant).  *“But we have good jargon between the students, ourselves, and the staff has functioned very well. Then, the students don’t always listen to what we say and so on, but it is really good communication”* (Cook).  *“Uh, yeah, there are many news things to try, since at home one usually eats the same thing. Uh, so it is fun to try new things. We had, this Street Food Friday where it was falafel in pita bread, which I hadn’t eaten before and it was actually good, so that was fun to try something new.”* (Female, year, 17)  *“By going to the different courses to develop ourselves, the vegetarian meals, special meals, and general meals can help us to make a lot more green meals and serve less meat”* (Kitchen assistant)  *“But we try, for example, that when we make meat sauce, if we reduce the meat and have a lot of vegetables in it without the students knowing.* [*...*] *But we try, we try really in the various meals to include a lot of vegetables without it showing”* (Cook).  *“I think that it is better to start with, with younger students...Because when they come here, then they have already decided how they want to eat”* (Head chef).  *“*[*...*] *There are many friends that- think that vegan food it a little dorky and stuff.”* (Male, year 1, 16) |
